# Supplementary material for: Initiation of Pancreatic Cancer: The Interplay of Hyperglycemia and Macrophages Promotes the Acquisition of Malignancy-Associated Properties in Pancreatic Ductal Epithelial Cells
Source: MDPI journal article supplement (doi:10.3390/ijms22105086), 2021-05-11
Supplement: s1 [file s1]

A

IL-6

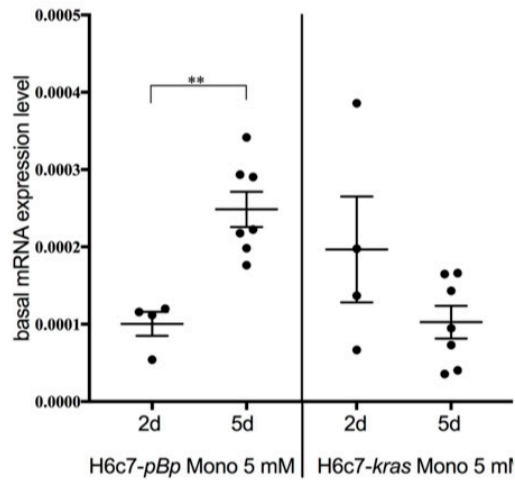

B

IL-8

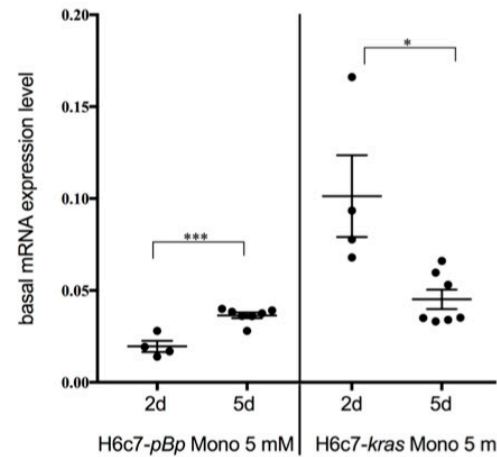

C

TNF- $\alpha$ 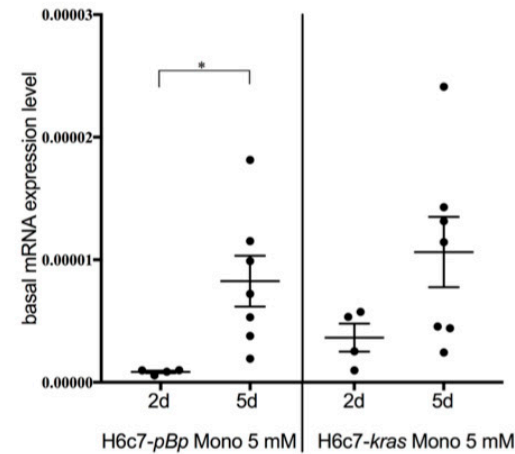

D

TGF- $\beta$ 1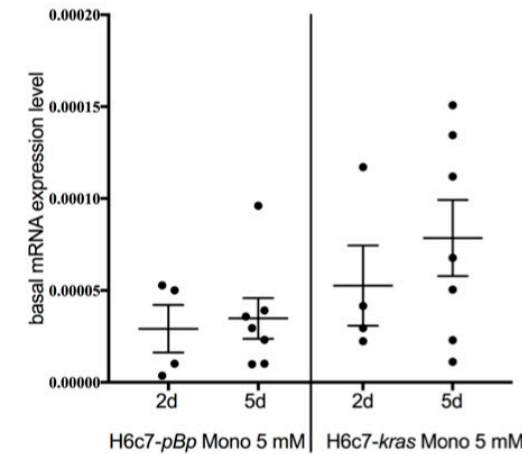

**Figure S1: Basal mRNA levels of EMT- and CSC-inducers in benign and premalignant PDEC.** H6c7-pBp or H6c7-kras cells were monocultured for 2 or 5 days under normoglycaemic conditions (5 mM D-glucose). RNA was isolated and analysed by qRT-PCR analysis. The relative mRNA levels of IL-6 (A), IL-8 (B), TNF- $\alpha$  (C) and TGF- $\beta$ 1 (D) are depicted, normalized to the housekeeping gene GAPDH and presented as basal mRNA expression level. Data are presented as mean and standard error of mean.

\*:  $0.05 > p > 0.0332$  \*\*:  $0.0331 > p > 0.0021$ ; \*\*\*:  $0.002 > p > 0.0001$ ; n= 4 for 2-day culture, n=7 for 5-day culture
