# Supplementary material for: Initiation of Pancreatic Cancer: The Interplay of Hyperglycemia and Macrophages Promotes the Acquisition of Malignancy-Associated Properties in Pancreatic Ductal Epithelial Cells
Source: MDPI journal article supplement (doi:10.3390/ijms22105086), 2021-05-11
Supplement: s1 [file s1]

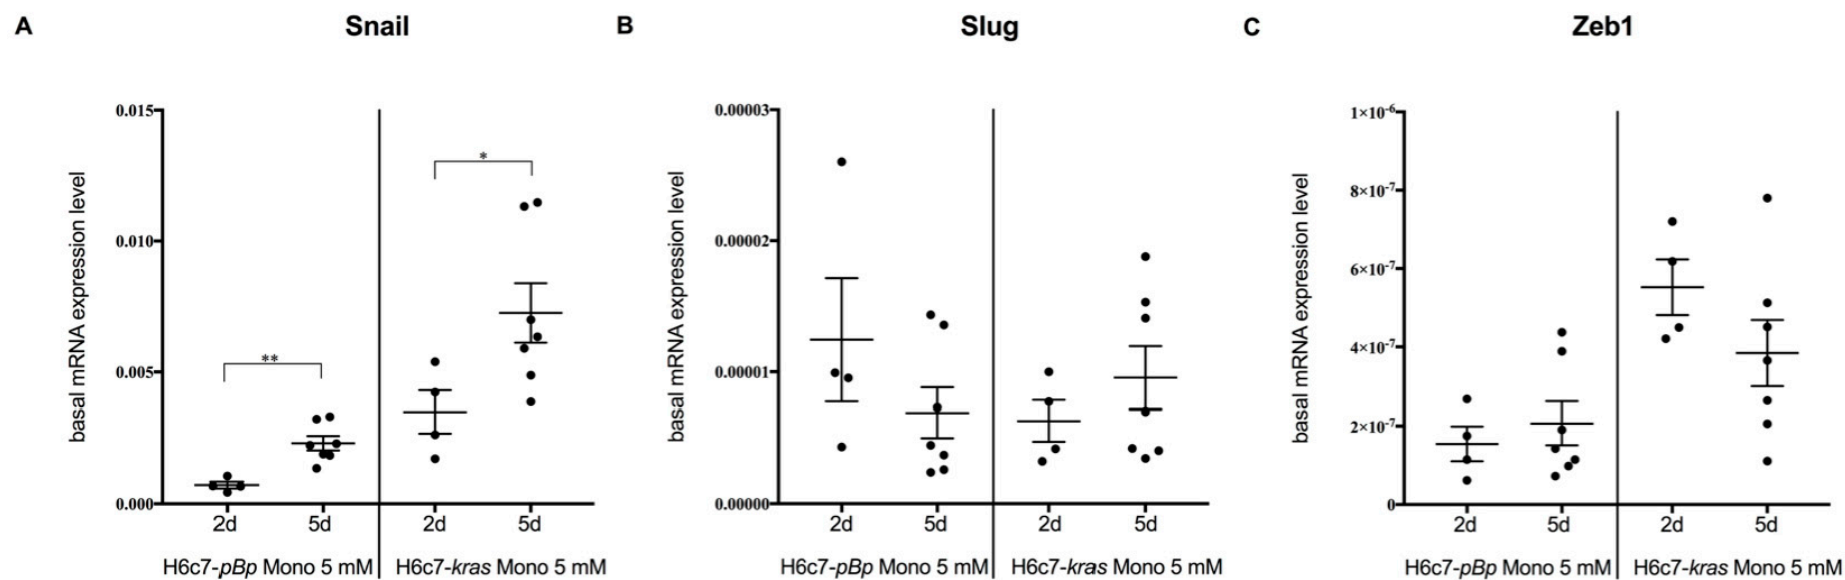

**Figure S2: Basal mRNA levels of EMT transcription factors in benign and premalignant PDEC.** H6c7-*pBp* or H6c7-*kras* cells were monocultured for 2 or 5 days under normoglycaemic conditions (5 mM D-glucose). RNA was isolated and analysed by qRT-PCR analysis. The relative mRNA levels of Snail (A), Slug (B) and Zeb1 (C) are depicted, normalized to the housekeeping gene GAPDH and presented as basal mRNA expression level. Data are presented as mean and standard error of mean. \*: 0,05>p>0,0332 \*\*: =0,0331 > p> 0,0021; \*\*\*=: 0,002 > p> 0,0001; n= 4 for 2-day culture, n=7 for 5-day culture
