# Supplementary material for: Initiation of Pancreatic Cancer: The Interplay of Hyperglycemia and Macrophages Promotes the Acquisition of Malignancy-Associated Properties in Pancreatic Ductal Epithelial Cells
Source: MDPI journal article supplement (doi:10.3390/ijms22105086), 2021-05-11
Supplement: s1 [file s1]

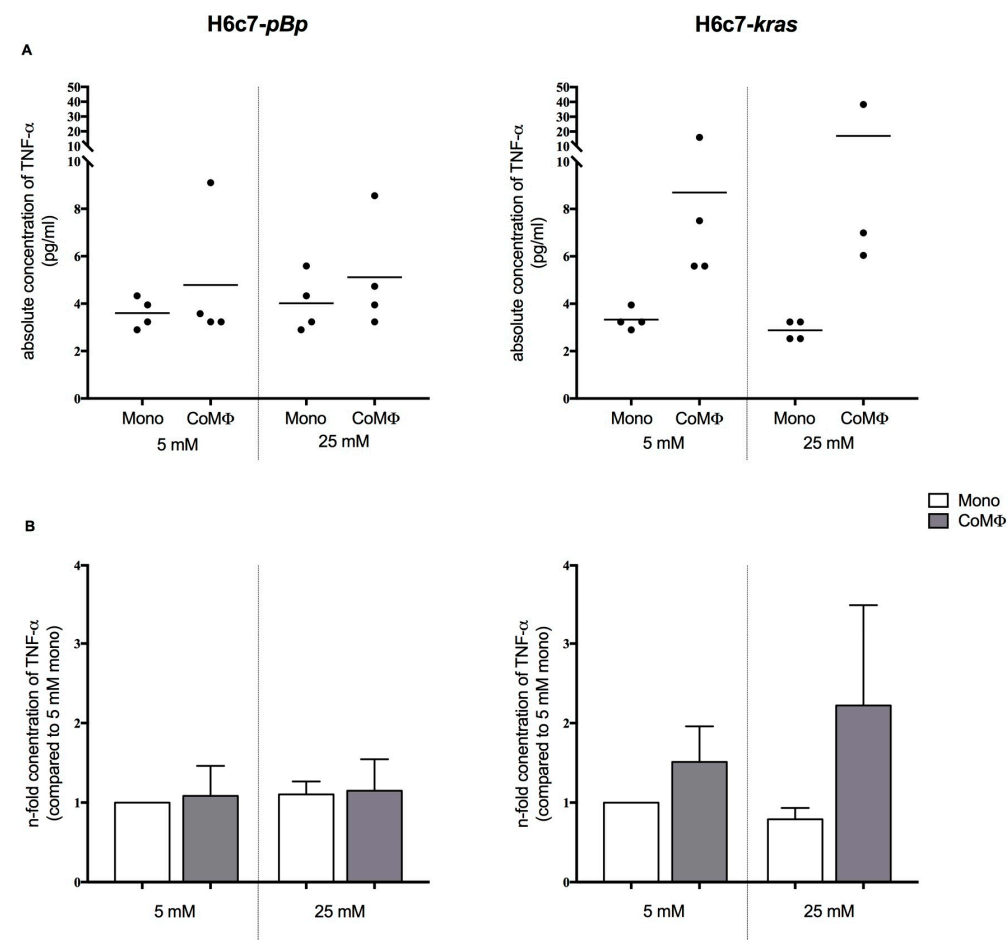

**Figure S6. TNF- $\alpha$  levels are elevated in the supernatants of premalignant PDEC upon exposure to macrophages and hyperglycaemia.** H6c7-*pBp* or H6c7-*kras* cells were cultivated in mono- or coculture with M1-polarized macrophages (M $\Phi$ ) under normo- or hyperglycaemic conditions (5 or 25 mM of D-glucose) for 5 days. The supernatant was aspirated and used for Multiplex analysis. The absolute (A) and relative (B) concentration of TNF- $\alpha$  in the supernatants of the differing culture conditions is depicted. It is normalized to the cell number and presented as n-fold expression compared to the monocultured 5 mM sample. Normally distributed data are presented as mean and standard error of mean; n= 4
